# The role of a single non-coding nucleotide in the evolution of an epidemic African clade of *Salmonella*

Disa L. Hammarlöf<sup>1,2\*</sup>, Carsten Kröger<sup>1,3\*</sup>, Siân V. Owen<sup>1\*</sup>, Rocío Canals<sup>1</sup>, Lizeth Lacharme Lora<sup>1</sup>, Nicolas Wenner<sup>1</sup>, Timothy J. Wells<sup>4</sup>, Ian R. Henderson<sup>4</sup>, Paul Wigley<sup>5</sup>, Karsten Hokamp<sup>6</sup>, Nicholas A. Feasey<sup>7</sup>, Melita A. Gordon<sup>5,8</sup> and Jay C.D. Hinton<sup>1#</sup>

<sup>1</sup>Institute of Integrative Biology, University of Liverpool, Liverpool, UK

<sup>2</sup>Department of Cell and Molecular Biology, Uppsala University, Uppsala, Sweden. <sup>3</sup>Moyne Institute of Preventive Medicine, Trinity College Dublin, Ireland

<sup>4</sup>Institute of Microbiology and Infection, University of Birmingham, Birmingham, UK

<sup>5</sup>Institute of Infection and Global Health, University of Liverpool, Liverpool, UK

<sup>6</sup>Smurfit Institute of Genetics, Trinity College Dublin, Ireland

<sup>7</sup>Liverpool School of Tropical Medicine, Liverpool, UK

<sup>8</sup> Malawi-Liverpool-Wellcome Trust Clinical Research Programme, Blantyre, Malawi

\*DLH, CK and SVO contributed equally to this work

#Corresponding author: Jay CD Hinton

Postal address: Institute of Integrative Biology, Biosciences Building, University of Liverpool, Crown Street, Liverpool L69 7ZB, United Kingdom. Telephone: +44 151 795 4573. Email address: [jay.hinton@liverpool.ac.uk](mailto:jay.hinton@liverpool.ac.uk)

## 1 **Introductory Paragraph**

2 *Salmonella enterica* serovar Typhimurium ST313 is a relatively newly emerged  
3 sequence type that is causing a devastating epidemic of bloodstream infections across  
4 sub-Saharan Africa. Analysis of hundreds of *Salmonella* genomes has revealed that  
5 ST313 is closely-related to the ST19 group of *S. Typhimurium* that cause  
6 gastroenteritis across the world. The core genomes of ST313 and ST19 vary by just  
7 1000 single-nucleotide polymorphisms (SNPs). We hypothesised that the phenotypic  
8 differences that distinguish African *Salmonella* from ST19 are caused by certain SNPs  
9 that directly modulate the transcription of virulence genes.

10 Here we identified 3,597 transcriptional start sites (TSS) of the ST313 strain D23580,  
11 and searched for a gene expression signature linked to pathogenesis of *Salmonella*.  
12 We identified a SNP in the promoter of the *pgtE* gene that caused high expression of  
13 the PgtE virulence factor in African *S. Typhimurium*, increased the degradation of the  
14 factor B component of human complement, contributed to serum resistance and  
15 modulated virulence in the chicken infection model. The PgtE protease is known to  
16 mediate systemic infection in animal models. We propose that high levels of  
17 expression PgtE of by African *S. Typhimurium* ST313 promotes bacterial survival and  
18 bacterial dissemination during human infection.

19 Our finding of a functional role for an extra-genic SNP shows that approaches used to  
20 deduce the evolution of virulence in bacterial pathogens should include a focus on  
21 non-coding regions of the genome.

## 22 Introduction

23 *Salmonella enterica* serovar Typhimurium (*S. Typhimurium*) is one of the best  
24 understood bacterial pathogens, and a major cause of gastroenteritis globally. One  
25 sequence type of *S. Typhimurium*, ST313, is the primary cause of invasive non-  
26 typhoidal Salmonellosis (iNTS) across Africa, resulting in ~388,000 deaths each year<sup>1</sup>.  
27 Co-infection with HIV or malaria infection and young age (<5 years of age) are known  
28 risk factors for iNTS infection<sup>1,2</sup>.

29 Multi-drug resistance (MDR) has contributed to the expansion of *S. Typhimurium*  
30 ST313. Whole-genome sequence-based phylogenetics revealed clonal replacement  
31 of ST313 lineage 1 by lineage 2 in the mid-2000s, accompanied by the acquisition of  
32 chloramphenicol resistance<sup>3</sup>. The ST313 clade has recently acquired resistance to  
33 ceftriaxone, a first-line antibiotic for MDR bacterial infections<sup>4</sup>. Genomic comparison  
34 between the 'classical' gastroenteritis-associated *S. Typhimurium* ST19 and the  
35 African ST313 isolates shows that gene content and synteny are highly conserved,  
36 that ST313 has a distinct repertoire of plasmids and prophages, and carries 77  
37 pseudogenes reflecting a degree of genome degradation<sup>5,6</sup>. ST313 and ST19 share  
38 >4,000 genes, and their core genomes differ by about 1,150 SNPs<sup>4</sup>. We have reported  
39 that 2.7% of the *S. Typhimurium* isolated from patients in England and Wales are  
40 ST313, but lack the characteristic prophages BTP1 and BTP5 that are signatures of  
41 African ST313 lineages<sup>7</sup>.

42 Certain virulence-associated phenotypes have been examined in ST313 strains.  
43 Compared with the ST19 group of gastroenteritis-associated *S. Typhimurium*, ST313  
44 is more resistant to complement-mediated killing by human serum<sup>8,9</sup> and to  
45 macrophage-mediated killing<sup>10</sup>. ST313 exhibits a stealth phenotype during  
46 macrophage infection consistent with an immune evasion strategy that causes  
47 reduced levels of IL-1 $\beta$  cytokine production, apoptosis and Caspase-1-dependent  
48 macrophage death<sup>10,11</sup>.

49 We used a functional genomic approach to search for single nucleotide  
50 polymorphisms responsible for the increased virulence of *S. Typhimurium* ST313  
51 lineage 2.

## 52 Results

53 The reference strain for *S. Typhimurium* ST313 lineage 2 is D23580, which was  
54 isolated from an HIV-negative Malawian child<sup>5</sup>. The strain 4/74 was isolated from a  
55 calf in the UK and is a well-characterised representative of *S. Typhimurium* ST19. Our  
56 challenge was to identify which, if any, of the >1000 SNPs that separate strains  
57 D23580 and 4/74 serve to differentiate the strains in terms of gene expression and  
58 phenotype. We investigated whether the emergence of the epidemic clade of *S.*  
59 *Typhimurium* ST313 was linked to the altered expression of a core genome-encoded  
60 virulence factor. Rather than focusing on a comparison of the core genome, we used  
61 comparative transcriptomics to identify transcripts that were both expressed at  
62 different levels and associated with a distinct SNP in the promoter region.

63 This study built upon the primary transcriptome of *S. Typhimurium* ST19 strain 4/74  
64 which we determined using a combination of RNA-seq and differential RNA-seq  
65 (dRNA-seq) under multiple infection-relevant growth conditions<sup>12,13</sup>. By working at the  
66 single-nucleotide level, we defined transcriptional start sites (TSS), and catalogued  
67 the transcripts expressed in the bacterial cell<sup>14,15</sup>. Here, we used the same approach  
68 to define the primary transcriptome and to identify the transcriptional start sites (TSS)  
69 of D23580, a representative strain of African *S. Typhimurium* ST313. RNA was  
70 isolated from *in vitro* growth conditions that reflect the extracellular and intracellular  
71 stages of infection, namely early stationary phase (ESP) and the SPI2-inducing  
72 condition (InSPI2) (Methods). To find all relevant TSS, a pooled sample containing  
73 RNA from 16 environmental conditions was also analysed<sup>13</sup> (Methods). TSS were  
74 identified by comparison of mapped sequence reads from each pair of dRNA-seq and  
75 RNA-seq samples as described<sup>12,13,15</sup>. We identified 3,597 TSS for *S. Typhimurium*  
76 strain D23580, revealing the active gene promoters across the genome of an ST313  
77 isolate for the first time. Previously, we reported the locations of 3,838 TSS for the  
78 ST19 strain 4/74<sup>12</sup>. Categorisation of the TSS into different classes showed that a  
79 similar proportion of transcription initiation sites of 4/74 and D23580 were designated  
80 as primary (61%) or antisense (11%) (Figure 1A).

81 We determined the level of conservation of transcriptional organisation between  
82 D23580 and 4/74 by identifying the TSS shared between the two strains. The locations  
83 of the majority of the TSS defined for strain 4/74 were conserved in strain D23580.

84 Specifically, of the 3,838 TSS of strain 4/74, 390 were absent from D23580 and  
85 included TSS located in the 4/74-specific regions of prophages *sopE*Φ and Gifsy-1  
86 (Supplementary Table 1g). We identified 63 D23580-specific TSS, mainly located in  
87 the BTP1 and BTP5 prophages of D23580 which are absent from strain 4/74<sup>5,6</sup>  
88 (Supplementary Table 1d).

89 To benchmark the transcriptional architecture, we first focused on *Salmonella*  
90 Pathogenicity Islands SPI1 and SPI2 which are required for key aspects of *Salmonella*  
91 virulence<sup>16</sup>. The locations of all TSS within the SPI1 and SPI2 islands were identical  
92 in strains D23580 and 4/74 (Figures 1B, Supplementary Table 1c). In summary, two  
93 closely-related *S. Typhimurium* strains that varied by ~1,500 SNPs at the core genome  
94 level had a high level of conservation at the transcriptional level and shared 90% of  
95 promoter regions (Supplementary Table 1a).

96 To address our hypothesis that the level of expression of certain virulence genes  
97 varied between strains D23580 and 4/74 due to changes at the DNA sequence level,  
98 we cross-referenced the SNP differences between the two strains with the locations  
99 of the TSS. We identified 19 TSS which were associated with nucleotide  
100 polymorphisms in the -40 to -1 region of the 2,211 primary TSS of D23580  
101 (Supplementary Table 3). We compared the expression level of each promoter  
102 between 4/74 and D23580, in 3 growth conditions, to identify the SNPs responsible  
103 for transcriptional changes. A SNP at the -12 position of the *pgtE* TSS, was associated  
104 with an average 11-fold increase in TSS expression in D23580 compared to 4/74  
105 (Supplementary Table 3), and we investigated this experimentally.

## 106 **Identification of a nucleotide that modulates expression of the PgtE virulence** 107 **factor**

108 PgtE is an outer-membrane protease that belongs to the Omptin family<sup>17</sup>, cleaves and  
109 mediates resistance to alpha-helical antimicrobial peptides, and also disrupts the  
110 human complement cascade by degrading Complement Factor B and other  
111 proteins<sup>18,19</sup>. PgtE does not contribute to intra-macrophage replication *per se*, but  
112 stimulates bacterial dissemination during murine infection<sup>20</sup> by facilitating extracellular  
113 survival upon release from host cells<sup>21-24</sup>. Expression of the *pgtE* transcript is induced  
114 during intra-macrophage replication<sup>25,26</sup>, controlled by the SPI2-associated regulators  
115 PhoPQ and SlyA<sup>18,27</sup>, and is activated by OmpR/EnvZ and SsrA/B<sup>14</sup>.

116 The promoter and coding regions of the *pgtE* gene were compared between D23580  
117 and 4/74 at the DNA sequence level, and differed by 2 SNPs. One SNP was identified  
118 in the coding region of *pgtE* at nucleotide location 2,530,498 in D23580 (2,504,548 in  
119 4/74) generating a synonymous mutation [T54 (ACT) in 4/74 → T54 (ACC) in D23580].  
120 The other SNP was located in the promoter region; the -12 nucleotide (relative to the  
121 +1 of the TSS) was C in 4/74 (C<sup>4/74</sup>) and T in D23580 (T<sup>D23580</sup>) (Figure 1C). This T  
122 nucleotide in the -10 motif is a highly conserved element of highly-expressed  
123 sigma70-dependent promoters<sup>13</sup>. We analysed the functional role of T<sup>D23580</sup> in the  
124 *pgtE* promoter region experimentally by replacing the T<sup>D23580</sup> nucleotide with C<sup>4/74</sup> by  
125 single nucleotide exchange mutagenesis to generate strain D23580 *pgtE*<sup>P4/74</sup>. Whole  
126 genome sequencing confirmed that the D23580 *pgtE*<sup>P4/74</sup> strain only contained the  
127 intended single nucleotide difference.

128 To determine the biological role of the T<sup>D23580</sup> nucleotide, we assayed the level of *pgtE*  
129 transcription in 4/74, D23580, D23580 *pgtE*<sup>P4/74</sup> and D23580  $\Delta$ *pgtE* strains using  
130 qRT-PCR (Figure 2A). The high level of *pgtE* expression in D23580 was reduced  
131 10-fold by the introduction of the single C<sup>4/74</sup> nucleotide in the -10 region of the *pgtE*  
132 promoter,  $P < 0.01$  (Figure 2A). The level of the *pgtE* transcript expression in 4/74 and  
133 the D23580 *pgtE*<sup>P4/74</sup> SNP mutant was similar.

134 We hypothesised that the high level of *pgtE* transcription would correlate with  
135 increased PgtE protein production in D23580 compared with wild-type strain 4/74  
136 (Figure 2B). A second Lineage 2 isolate D37712 had the same PgtE phenotype. In  
137 contrast, low levels of PgtE were produced by the ST313 Lineage 1 isolates A130 and  
138 D25248, and ST19 isolates 14028 and LT2 (Figure 2B). The enhanced production of  
139 PgtE by D23580 was reduced to the level of the 4/74 strain by a single nucleotide  
140 change in strain D23580 *pgtE*<sup>P4/74</sup>. Consistent with this, the introduction of the T<sup>D23580</sup>  
141 SNP into strain 4/74 caused increased PgtE protein production (Figure 2B). Taken  
142 together, our data show that D23580 expresses high levels of *pgtE* at the  
143 transcriptional and protein level, and this is driven by the T<sup>D23580</sup> nucleotide in the -10  
144 region of the *pgtE* promoter.

145 **The T<sup>D23580</sup> SNP increases resistance to human serum killing and modulates**  
146 **cleavage of Complement Factor B**

147 To determine the impact of the increased PgtE activity mediated by the promoter  
148 T<sup>D23580</sup> SNP upon extracellular survival, we undertook serum bactericidal assays.  
149 Several bacterial factors contribute to the serum resistance phenotype of *Salmonella*,  
150 including the long heterogenic O-antigen side chains of smooth lipopolysaccharide  
151 (LPS), which is the outermost component of the cell envelope of the Gram-negative  
152 cell<sup>28–30</sup>. Therefore, we assayed resistance to human serum killing of *in vitro*-grown  
153 *S. Typhimurium* that lacked the LPS biosynthetic alpha1,3-glucosyltransferase  
154 enzyme WaaG. Following treatment with serum, the level of survival of D23580  
155  $\Delta waaG$  was significantly higher than D23580  $\Delta waaG$   $pgtE^{P4/74}$  ( $P < 0.05$ ) (Figure 3A).  
156 No killing was observed following treatment with heat-inactivated serum that lacked  
157 active complement (data not shown). In summary, the promoter T<sup>D23580</sup> SNP increases  
158 resistance of D23580 to serum killing and the low level of  $pgtE$  expression driven by  
159 the  $pgtE^{P4/74}$  promoter does not.

160 To understand the mechanism of the serum-resistance phenotype, we determined the  
161 ability of the *S. Typhimurium* strains to mediate PgtE-dependent cleavage of  
162 Complement Factor B (Figure 3B). In agreement with the literature<sup>31</sup>, no PgtE activity  
163 was detected in strains expressing smooth LPS (Fig. 3C, Lanes 1-3 (D23580), Lanes  
164 7-8 (4/74)). Because the results of the serum resistance assay showed that short  
165 (rough) LPS was required to visualise PgtE activity, we again conducted experiments  
166 in a  $\Delta waaG$  background (Figure 3B, Lanes 4-6 and 9-10), and determined that the  
167 D23580  $\Delta waaG$  mutant showed a high level of Complement Factor B cleavage. In  
168 contrast, 4/74  $\Delta waaG$  and the D23580  $\Delta waaG$   $pgtE^{P4/74}$  strains showed a low level of  
169 Complement Factor B degradation.

170 We speculate after the pathogen exits macrophages, the high level of expression of  
171 PgtE in *S. Typhimurium* ST313 strain D23580 interferes with opsonisation and  
172 increases resistance to complement-mediated serum killing.

173 **Assessment of PgtE-mediated virulence in the chicken infection model**

174 Because *S. Typhimurium* ST313 has a hyper-invasive phenotype during chicken  
175 infection<sup>32</sup>, this infection model was used to assess the virulence of the wild-type  
176 D23580 and the D23580  $pgtE^{P4/74}$  strains. Following oral infection, the D23580

177 *pgtE*<sup>P4/74</sup> SNP strain and the D23580  $\Delta$ *pgtE* strain showed significant attenuation in  
178 comparison to D23580 wildtype (P=0.0035 and P=0.0379, respectively), based on two  
179 independent repeats of the experiment (Figure 3C). The data show some bird-to-bird  
180 variation between all three tested isolates, which is likely a consequence of the oral  
181 route of infection and the use of a commercial outbred chicken line. However, overall  
182 the results showed that exchange of the T<sup>D23580</sup> SNP to the C<sup>4/74</sup> genotype resulted in  
183 lower median bacterial numbers and a reduced number of animals with splenic  
184 infection, equivalent to that seen in the absence of PgtE (10/19 for D23580 compared  
185 to 2/19 for D23580 *pgtE*<sup>P4/74</sup> and 4/19 for D23580  $\Delta$ *pgtE*). We conclude that PgtE is  
186 required for successful infection of the chicken, and that full virulence of D23580  
187 requires the high levels of expression of PgtE driven by the T<sup>D23580</sup> nucleotide.

### 188 **The *pgtE* promoter SNP is only carried by African ST313 lineage 2, and not** 189 **lineage 1**

190 To determine if the *pgtE* promoter T<sup>D23580</sup> SNP is a characteristic feature of iNTS, the  
191 *pgtE* promoter SNP was analysed in the context of a phylogeny of 268 genomes of *S.*  
192 Typhimurium ST313 including isolates from Malawi, as well as recently described UK-  
193 ST313 genomes<sup>7</sup>. The 228 genomes that carried the T<sup>D23580</sup> SNP formed a  
194 monophyletic cluster that included lineage 2, as well as the UK-ST313 strains that  
195 share most recent common ancestry with lineage 2 (Figure 4). The C<sup>4/74</sup> SNP was  
196 found to be conserved in all 27 lineage 1 genomes and the UK-ST313 genomes which  
197 shared more recent common ancestry with lineage 1. This suggests that the T<sup>D23580</sup>  
198 SNP first arose in a common ancestor of lineage 2 and a subset of the UK-ST313  
199 (Supplementary Figure 2).

### 200 **The *pgtE* promoter is highly conserved in *Salmonella enterica***

201 To understand the wider distribution of the *pgtE* promoter SNP in the *Salmonella*  
202 genus, the conservation of the SNP was assessed in 84 published complete genomes  
203 representing the known genomic diversity of *Salmonella*. The *pgtE* TSS was not found  
204 to be conserved in *S. Bongori* (Supplementary Table 4). Of 80 *S. enterica* genomes  
205 screened, 79/80 genomes carried the C<sup>4/74</sup> genotype. The T<sup>D23580</sup> SNP was only found  
206 in *S. Gallinarum* str. 287/91, raising the possibility that the SNP has arisen  
207 independently in this serovar (Figure 4). Apart from the -12 SNP present in *S.*  
208 Typhimurium ST313 and *S. Gallinarum*, the *pgtE* TSS -35 region was found to be



209 100% conserved in 75/80 *Salmonella enterica* genomes, with only serovar Agona and  
210 subspecies Arizonae showing sequence divergence (Supplementary Table 4).

211

212 In summary, the -10 C<sup>4/74</sup> → T<sup>D23580</sup> allele of the D23580 *pgtE* promoter causes an  
213 increase in transcription of the *pgtE* gene and the production of high levels of PgtE  
214 protein in D23580. The increased activity of PgtE in D23580 leads to degradation of  
215 Complement Factor B which is required for activation of the alternative complement  
216 pathway. Importantly, the single SNP in the D23580 *pgtE* promoter drives the ability  
217 of D23580 to cause hyper-invasion in an avian infection model. Only one of 80  
218 complete *S. enterica* genomes, that of *S. Gallinarum*, carried the -12 T allele. *S.*  
219 *Gallinarum* is the causal agent of fowl typhoid, suggesting a putative link between the  
220 T<sup>D23580</sup> SNP and the ability of *S. enterica* to cause systemic infection<sup>33</sup>. We have shown  
221 that the *pgtE* promoter SNP is a signature of ST313 lineage 2, which clonally-replaced  
222 ST313 lineage 1 in the early 2000s<sup>3</sup>. All isolates of ST313 lineage 2 carried the same  
223 -12 T<sup>D23580</sup> SNP.

## 224 Discussion

225 Previous studies have identified SNP mutations associated with the host tropism of  
226 notorious pathogens such as *Staphylococcus aureus*<sup>34</sup>, and *Campylobacter jejuni*<sup>35</sup>.  
227 However, these examples involved SNP mutations located within coding genes, and  
228 functionally-important SNP mutations have rarely been identified in intergenic regions  
229 of bacteria. As the expression of a gene is dependent on the -10 and -35 recognition  
230 motifs of sigma 70-dependent promoters<sup>36</sup>, a single nucleotide change can modulate  
231 promoter function. Examples include the C → T transition in the -10 promoter motif of  
232 the *Mycobacterium tuberculosis eis* gene, that increases *eis* expression to generate  
233 low-level resistance to Kanamycin<sup>37</sup>. Similarly, a promoter SNP that affected  
234 expression of *E. coli* succinate transporter *dctA* evolved to increase the utilisation of  
235 citrate as a carbon source in one population of the Long Term Evolution Experiment<sup>38</sup>.

236 Here, we have identified a single SNP responsible for high levels of expression of the  
237 PgtE outer membrane protease, and have linked this to the virulence of African *S.*  
238 Typhimurium ST313. Our study has implications for other bacterial genome-wide  
239 association studies, which should clearly include a focus on non-coding regions of the  
240 genome. The findings also emphasise the value of identifying all gene promoters in  
241 bacterial pathogens, to allow nucleotide differences to be correlated with the process  
242 of transcriptional initiation.

243 We propose that the high level of PgtE activity in D23580, together with the inactivated  
244 *sseI* effector gene<sup>39</sup> and the acquisition of chloramphenicol resistance<sup>3</sup>, has been a  
245 factor in the success of epidemic ST313 lineage 2 .

246 A pre-requisite for PgtE activity is the remodelling of LPS that occurs during intra-  
247 macrophage replication that results in shortening of the oligosaccharide chains<sup>21</sup>. *S.*  
248 Typhimurium bacteria produce high levels of *pgtE* transcript inside host  
249 macrophages<sup>25,26</sup>, and PgtE protease activity is high in bacteria released from infected  
250 macrophages<sup>21</sup>. Therefore the *pgtE* T<sup>D23580</sup> SNP represents a putative mechanism for  
251 priming intracellular bacteria for an extracellular lifestyle, and the survival of  
252 complement-mediated attack by the innate immune system. The opsonic activity of  
253 complement has been shown to be essential for phagocyte-mediated killing of  
254 *Salmonella* in the blood of African people<sup>40</sup> and therefore our data are consistent with

255 the hypothesis that subversion of complement activity contributes to the pathogenesis  
256 of invasive non-typhoidal *Salmonella* in Africa.

257 The T<sup>D23580</sup> SNP in the -10 motif of the *pgtE* promoter causes increased PgtE protease  
258 activity, and was an early evolutionary event in an ancestor of ST313 lineage 2 which  
259 primed the emergence and dominance of ST313 lineage 2 in iNTS disease across sub  
260 Saharan Africa.

## 261 **Material and methods**

### 262 **Bacterial strains, growth conditions**

263 *Salmonella enterica* serovar Typhimurium (*S. Typhimurium*) strain 4/74 (accession  
264 number CP002487), a representative of non-typhoidal *Salmonella* sequence type 19,  
265 and D23580 (accession number FN424405), a representative strain of non-typhoidal  
266 *Salmonella* sequencing type 313 (ST313) were used in the study. Strain D23580 was  
267 isolated from an HIV-negative child from Malawi with blood stream infection, and use  
268 of this strain has been approved by the Malawian College of Medicine (COMREC  
269 ethics number P.08/14/1614). Other wild-type strains belonging to ST19 and ST313  
270 used in this study are listed in Supplementary Table 5.

271 All environmental growth conditions were repeated exactly as previously described<sup>12</sup>  
272 with the exception that the 'pool' sample was obtained by pooling RNA from 16  
273 environmental conditions (EEP, MEP, LEP, ESP, LSP, 25°C, NaCl shock, Bile shock,  
274 Low Fe<sup>2+</sup> shock, Anaerobic shock, Anaerobic growth, Oxygen shock, NonSPI2,  
275 InSPI2, Peroxide shock (InSPI2) and Nitric oxide shock (InSPI2)<sup>12</sup>.

276 When required, Lennox broth (LB) was supplemented with the following antibiotics:  
277 chloramphenicol (Cm), 25 µg/ml; kanamycin (Km), 50 µg/ml, tetracycline (Tc), 20  
278 µg/ml and gentamicin (Gm), 20 µg/ml.

### 279 **Preparation of cDNA libraries and Illumina sequencing**

280 Prior to RNA-seq, total RNA was extracted using Trizol, and treated with DNase I as  
281 described previously<sup>13</sup>. RNA integrity was inspected visually with the Bioanalyzer  
282 (Agilent technologies). Contaminating DNA was removed using DNase I (Ambion) and  
283 RNA samples were not ribo-depleted prior to cDNA library construction. cDNA library  
284 construction, TEX-treatment for dRNA-seq (ESP, InSPI2 and pooled sample) and  
285 RNA-seq with the Illumina HiSeq platform was carried out by Vertis Biotechnologie,  
286 Germany. All protocols were identical to those used previously<sup>12,13</sup>. Sequence reads  
287 were mapped against the *S. Typhimurium* D23580 reference genome using  
288 Segemehl, with accuracy set to 100%<sup>43,44</sup>. RNA-seq and dRNA-seq data can be  
289 downloaded as raw reads (.fastq file format) the GEO database accession  
290 number XXXXXXXX.

### 291 **Identification of Transcriptional Start Sites by a combination of RNA-seq and** 292 **dRNA-seq**

293 Methods used to assign TSS in D23580 have been described previously<sup>13</sup>. Briefly, a  
294 TSS was assigned when it was enriched in one of the dRNA-seq libraries (ESP, InSPI2  
295 or Pool) compared with the corresponding RNA-seq library, and was linked to an  
296 expressed transcript. This analysis was followed by a second step of validation, in  
297 which the Transcripts Per Million (TPM) approach<sup>45,46</sup> was used to calculate an  
298 expression value for the first 10 nucleotides associated with each TSS, designated the  
299 Promoter Usage Value (PUV)<sup>13,26</sup>. A TSS was considered to be expressed when the  
300 PUV was  $\geq 10$ . A TSS was defined as 'conserved' between D23580 and 4/74 if the  
301 TSS nucleotide sequence was present in both strains, and the PUV value of the TSS  
302 was  $\geq 10$ .

### 303 **Identification of TSS-located SNP mutations associated with different levels of** 304 **transcript expression in D23580 and 4/74**

305 A list of SNP differences between the D23580 and 4/74 reference genomes  
306 (accessions FN424405 and CP002487) was generated using NUCmer<sup>47</sup> resulting in  
307 1,488 SNPs and small indels (Supplementary Table 2). We identified the SNPs located  
308 within the -40 to -1 region of primary TSSs in D23580 (primary = primary + primary/as  
309 + primary/internal) (Supplementary Table 1, Supplementary Table 3). PUV values for  
310 each promoter in D23580 and 4/74<sup>13</sup> were used to analyse the activity of the  
311 promoters associated with SNP differences in the -40 to -1 TSS region.

### 312 **Bacterial strain construction using $\lambda$ red recombineering**

313 All the bacterial strains and plasmids used and constructed in this study are described  
314 in Supplementary Table 5 and the ssDNA oligonucleotides (primers) in Supplementary  
315 Table 6.

316 The  $\Delta pgtE$ ,  $\Delta waaG$  and  $pgtE$ -FLAG mutations were constructed in *S. Typhimurium*  
317 ST19 and ST313 strains using the standard  $\lambda$  red recombination methodology<sup>48</sup>. The  
318 heat-inducible  $\lambda$  red recombineering plasmid pSIM5-*tet* was used and the induction of  
319 the  $\lambda$  red operon was achieved by heat treatment (42°C, 15 min) of bacterial cultures  
320 grown to mid-exponential phase (OD<sub>600</sub> 0.3-0.4 at 30°C) in LB supplemented with Tc<sup>48-</sup>  
321 <sup>50</sup>. After recombination<sup>48-50</sup>, all the genetic constructs (except the  $\Delta waaG::Kan$   
322 mutation) were transferred into a clean wild-type background by phage transduction,  
323 using the P22 HT 105/1 *int*-201<sup>51</sup> as previously described<sup>6</sup>. When required, the

324 antibiotic resistance cassettes were flipped-out using the FLP recombinase  
325 expression plasmid pCP20-TcR<sup>52</sup>.

326 The *pgtE* gene was deleted in *S. Typhimurium* using PCR fragments generated with  
327 the primers DH95 and DH96 and the template plasmids pKD4 and pKD3. The resulting  
328 fragments, carrying respectively the Km resistance (Kan) or the Cm resistance (Cam)  
329 cassettes were respectively electroporated into D23580 and 4/74 carrying pSIM5-*tet*  
330 and recombinant  $\Delta$ *pgtE*::Kan/Cam mutants were selected on Km or Cm LB agar  
331 plates. Finally, the mutations were transduced in the corresponding wild-type strain  
332 and the resistance cassette was removed, as described above. Similarly, *waaG* was  
333 inactivated using the primers del\_*waaG*\_F and del\_*waaG*\_R and pKD4 as template.

334 The FLAG-tagged strains were generated using a forward primer (DH93) which  
335 included the region homologous to *pgtE* end ('*pgtE*), the nucleotide sequence  
336 encoding the FLAG octa-peptide in frame with the *pgtE* coding region, the *pgtE* stop  
337 codon and a region homologous to the resistance cassette (Song, Kong et al. 2008).  
338 The '*pgtE*-FLAG-Kan and '*pgtE*-FLAG-Cam modules were amplified by PCR using  
339 respectively pKD4 and pKD3 and primers DH93 / DH94. The resulting amplicons were  
340 respectively electroporated into *S. Typhimurium* ST313 (except A130) or ST19 (and  
341 A130) strains, carrying all pSIM5-*tet* and recombinants were selected on Km or Cm  
342 LB agar plates. The insertions were then transduced in to the corresponding wild-type  
343 strains and the resistance cassettes were removed, as described above.

#### 344 **Construction of scarless single nucleotide substitution mutants**

345 Two different methods were used to construct single nucleotide mutants. The single  
346 nucleotide T→C substitution in the *pgtE* promoter of *S. Typhimurium* D23580 was  
347 constructed using a single stranded DNA (ssDNA) recombineering approach, as has  
348 been previously described<sup>53</sup>. The protocol was identical to that used for construction  
349 of mutants using  $\lambda$  *red* recombineering (described above) except that 400 ng of the  
350 manufactured primer DH90), (HPLC purified) were used in the transformation reaction.  
351 After 2 hours of recovery at 30°C, dilutions of transformation were plated on LB agar  
352 (without selection). Clones were re-streaked and screened by a stringent PCR with  
353 primers DH40 and DH41. Primer DH40 has full complementarity with the sought after  
354 mutant, representing one mis-match to the original strain (these two types could be  
355 distinguished using a stringent annealing temperature) while DH41 has full

356 complementarity with both types of clone. The correct allele of the D23580 *pgtE*<sup>P4/74</sup>  
357 strain was confirmed by whole genome sequencing using Illumina technology  
358 (MicrobesNG, University of Birmingham). Variant-calling analysis confirmed that the  
359 D23580 *pgtE*<sup>P4/74</sup> strain had the intended single nucleotide difference compared with  
360 the WT strain (data not shown).

361 The single nucleotide C→T substitution in the *pgtE* promoter of *S. Typhimurium* 4/74  
362 (chromosomal position 2504765) was carried out by a scarless genome editing  
363 technique based on the pEMG suicide plasmid, as previously described<sup>6,54</sup>. The  
364 pEMG derivative pNAW41 that carries the *pgtE* promoter region with the specific  
365 substitution was constructed as follows: the regions flanking the targeted nucleotide  
366 were PCR amplified with the primers pairs NW\_122 / NW\_123 and NW\_124 /  
367 NW\_125, using 4/74 genomic DNA as template. The primers NW\_123 and NW\_124  
368 encode for C→T substitution and are complementary to each other over a stretch of  
369 twenty nucleotides. The resulting PCR fragments (504 and 505 bp, respectively) were  
370 fused by overlap extension PCR and the resulting 989 bp fragment was digested and  
371 cloned into pEMG using the *Bam*HI and *Eco*RI restriction sites. The pNAW41 suicide  
372 plasmid was mobilized from *E. coli* S17-1  $\lambda$ pir into *S. Typhimurium* 4/74 by conjugation  
373 and transconjugants that have integrated pNAW41 by homologous recombination  
374 were selected on minimal medium M9 agar supplemented with 0.2 % of glucose and  
375 Km. The resulting merodiploids were resolved using the pSW-2 plasmid as previously  
376 described<sup>6</sup> and the C→T substitution was confirmed by PCR amplification and  
377 sequencing, using the primers NW\_155 and NW\_156.

### 378 **Quantitative PCR (qRT-PCR)**

379 Total RNA was extracted from bacteria from mid-exponential (OD<sub>600</sub> = 0.3) cultures of  
380 bacteria grown in PCN/InSPI2, DNase-treated with Turbo DNA-free kit (Ambion) and  
381 the RNA integrity was inspected visually using the Bioanalyzer. Complete DNA-  
382 removal was confirmed by a negative PCR reaction with 40 cycles. Four hundred ng  
383 of RNA was converted into cDNA using the GoScript Reverse Transcription System  
384 (Promega), with random primers according to the manufacturer's instructions. The  
385 Sensifast SYBR Hi\_ROX Kit (Bioline) was used for qRT-PCR. For each qRT-PCR  
386 reaction, performed in duplicate, 26.66 ng cDNA was used in total reaction volumes  
387 of 20  $\mu$ l. The amount of *pgtE* and *hns* mRNA was calculated using a standard curve  
388 based on ten-fold dilutions of genomic DNA (10 ng/ $\mu$ l - 0.0001 ng/ $\mu$ l), included in each

389 qRT-PCR run. The amount of *pgtE* mRNA was normalized to the amount of *hns*  
390 mRNA.

### 391 **Western blot analysis**

392 *Salmonella* strains carrying the FLAG-tagged version of *pgtE* were grown in  
393 PCN/InSPI2 medium to OD<sub>600</sub> = 0.3. Bacteria were harvested from 10 ml of culture by  
394 centrifugation (7,000 × *g*, 5 min, 4°C). Cells were washed once with PBS and  
395 suspended in 67.5 µl of the same buffer. Seventy-five microliters of Laemmli Buffer 2×  
396 (120 mM Tris-HCl pH 6.8, 4% w/v SDS, 20 % v/v glycerol, Bromophenol blue 0.02 %  
397 w/v) and 7.5 µl β-mercaptoethanol were subsequently added to the samples. The  
398 extracts were boiled for 10 min, chilled on ice, and cell debris were pelleted by  
399 centrifugation (20,000 × *g*, 5 min, 4°C). Fifteen microliters of the samples (supernatant)  
400 were loaded on a SDS 10% polyacrylamide gel and proteins were separated for 80  
401 min at 150 V in SDS-PAGE running buffer (25 mM Tris, 192 mM glycine, 0.1% SDS).  
402 Proteins were transferred onto a methanol soaked PVDF membrane (Roche, Cat. No.  
403 3 010 040) using semi-wet transfer system (Bio-Rad, #170-3940) for 2 hours, 125 mA  
404 at 4°C in transfer buffer (25 mM Tris, 192 mM glycine). The membrane was blocked  
405 for 15 hours at 4°C in Tris-buffered saline (TBS: 10 mM Tris-HCl pH 7.5, 0.9% NaCl)  
406 supplemented with 5 % w/v of dry skimmed milk. Incubation with the antibodies (1  
407 hour at room temperature) and washing steps (two washes for 15 min each) were  
408 done in TBS containing 0.1 % v/v Tween 20 and 0.5% w/v dry skimmed milk. The  
409 primary antibodies Monoclonal ANTI-FLAG M2 antibody (1:3,000 diluted, Sigma-  
410 Aldrich F3165) and anti-DnaK mAb 8E2/2 (1:10,000 diluted, Enzo Life Sciences, ADI-  
411 SPA-880) were used for the detection of PgtE-FLAG and DnaK (loading control),  
412 respectively. After incubation with the primary antibodies, the membrane was washed  
413 and incubated with the secondary antibody (Goat anti-mouse IgG (H+L)-HRP, 1:2,500  
414 diluted, Bio-Rad, # 172-1011). After washes, the membrane was rinsed briefly in TBS  
415 prior to addition of Pierce ECL western blotting substrate (Thermo Scientific, 32109)  
416 and the chemiluminescence reaction was measured using the Image Quant LAS 4000  
417 imager (GE Healthcare Life Sciences).

### 418 **Complement Factor B cleavage assay**

419 The Complement Factor B cleavage assay was carried out as described<sup>19</sup>, with the  
420 following modifications. Bacterial strains were grown overnight in LB at 37°C.



421 Overnight culture was pelleted by centrifugation and washed twice in PBS. Two OD<sub>600</sub>  
422 (in 200 µl PBS containing 33 ng/µl of Complement Factor B) were incubated at 37°C  
423 in a heat block with agitation (700 rpm) for two hours and subsequently pelleted by  
424 centrifugation. Sixty-six ng of Complement Factor B were separated on an SDS-  
425 PAGE, prior to Western blotting as described above.

#### 426 **Serum bactericidal assays**

427 Serum bactericidal assays were performed four times using a modification of the  
428 previously described method<sup>55</sup>. Briefly, bacteria were grown to OD<sub>600</sub>= 2 in 5 ml of LB  
429 at 37°C and re-suspended in PBS to a final concentration of 10<sup>7</sup> CFU/ml; 10 µl was  
430 then mixed with 90 µl of undiluted pooled healthy human serum at 37°C with shaking  
431 (180 rpm), and viable counts determined. Killing was confirmed to be due to the activity  
432 of complement by using 56°C heat-inactivated serum as a control.

#### 433 **Chicken infection experiments**

434 All work was conducted in accordance with United Kingdom legislation governing  
435 experimental animals under project license PPL 40/3652 and was approved by the  
436 University of Liverpool ethical review process prior to the award of the license. All birds  
437 were checked a minimum of twice daily to ensure their health and welfare. Birds were  
438 housed in accommodation meeting UK legislation requirements. 1-day old Lohmann  
439 Brown Layers were obtained from a commercial hatchery, separated into groups on  
440 arrival and given *ad libitum* access to water and a laboratory-grade vegetable protein-  
441 based pellet diet (SDS, Witham, UK). Chicks were housed at a temperature of 30°C.  
442 At 7 days of age chickens were inoculated by oral gavage with 10<sup>8</sup> CFU of *S.*  
443 Typhimurium strains D23580, D23580 *pgtE*<sup>P4/74</sup> or D23580  $\Delta$ *pgtE*. At 3 days post  
444 infection, 10 birds from each group were killed for post-mortem analysis. Samples from  
445 spleen, liver and the caecal contents were removed aseptically from each bird and  
446 diluted 1:5 (wt/vol.) in sterile phosphate-buffered saline (data from caecal content and  
447 liver not shown). Tissues were then homogenized in a Colworth 80 microstomacher  
448 (A.J. Seward & Co. Ltd, London, UK). Samples were serially diluted and dispensed  
449 onto Brilliant Green agar (Oxoid, Cambridge, UK) to quantify numbers of *Salmonella*  
450 as described previously<sup>56</sup>.

#### 451 **Analysis of the conservation of the *pgtE* promoter SNP**

452 259 genomes of *S. Typhimurium* ST313 isolates from Malawi and the UK<sup>7</sup> were  
453 assembled using the A5 pipeline<sup>57</sup> and Abacus<sup>58</sup> unless reference quality genomes  
454 were available (all strains and accession numbers are given in Supplementary Table  
455 2). Additionally 84 reference genomes were downloaded from NCBI that represent the  
456 known diversity of the *Salmonella* genus. Core genome SNPs were identified using  
457 the PanSeq package<sup>59</sup> and a maximum likelihood phylogenetic tree was constructed  
458 from the concatenated SNP alignment using PhyML<sup>60</sup>. BLASTn was used to identify  
459 the genotype of the *pgtE* TSS -35 region nucleotide in all genomes (Supplementary  
460 Table 2).

461 **REFERENCES**

- 462 1. Ao, T. T. et al. Global burden of invasive nontyphoidal Salmonella disease, 2010.  
463 *Emerg. Infect. Dis.* 21, 941-949 (2015).
- 464 2. Feasey, N. A., Dougan, G., Kingsley, R. A., Heyderman, R. S. & Gordon, M. A.  
465 Invasive non-typhoidal salmonella disease: an emerging and neglected tropical  
466 disease in Africa. *Lancet* **379**, 2489–99 (2012).
- 467 3. Okoro, C. K. et al. Intracontinental spread of human invasive Salmonella  
468 Typhimurium pathovariants in sub-Saharan Africa. *Nat. Genet.* **44**, 1215–1221  
469 (2012).
- 470 4. Kariuki, S. et al. Ceftriaxone-resistant Salmonella enterica serotype typhimurium  
471 sequence type 313 from Kenyan patients is associated with the blaCTX-M-15  
472 gene on a novel IncHI2 plasmid. *Antimicrob. Agents Chemother.* **59**, 3133–3139  
473 (2015).
- 474 5. Kingsley, R. A. et al. Epidemic multiple drug resistant Salmonella Typhimurium  
475 causing invasive disease in sub-Saharan Africa have a distinct genotype.  
476 *Genome Res.* **19**, 2279–87 (2009).
- 477 6. Owen, S. V. et al. Characterization of the Prophage Repertoire of African  
478 Salmonella Typhimurium ST313 Reveals High Levels of Spontaneous Induction  
479 of Novel Phage BTP1. *Front. Microbiol.* **8**, 235 (2017).
- 480 7. Ashton, P. M. et al. Salmonella enterica Serovar Typhimurium ST313  
481 Responsible For Gastroenteritis In The UK Are Genetically Distinct From Isolates  
482 Causing Bloodstream Infections In Africa. *bioRxiv* 139576 (2017).  
483 doi:10.1101/139576

- 484 8. Goh, Y. S. & MacLennan, C. A. Invasive African nontyphoidal Salmonella  
485 requires high levels of complement for cell-free antibody-dependent killing. *J.*  
486 *Immunol. Methods* **387**, 121–129 (2013).
- 487 9. Siggins, M. K. *et al.* Differential timing of antibody-mediated phagocytosis and  
488 cell-free killing of invasive African Salmonella allows immune evasion. *Eur. J.*  
489 *Immunol.* **44**, 1093–1098 (2014).
- 490 10. Ramachandran, G., Perkins, D. J., Schmidlein, P. J., Tulapurkar, M. E. &  
491 Tennant, S. M. Invasive Salmonella Typhimurium ST313 with Naturally  
492 Attenuated Flagellin Elicits Reduced Inflammation and Replicates within  
493 Macrophages. *PLoS Negl. Trop. Dis.* **9**, (2015).
- 494 11. Carden, S., Okoro, C., Dougan, G. & Monack, D. Non-typhoidal Salmonella  
495 Typhimurium ST313 isolates that cause bacteremia in humans stimulate less  
496 inflammasome activation than ST19 isolates associated with gastroenteritis.  
497 *Pathog. Dis.* **73**, (2015).
- 498 12. Kröger, C. *et al.* An Infection-Relevant Transcriptomic Compendium for  
499 Salmonella enterica Serovar Typhimurium. *Cell Host Microbe* **14**, 683–695  
500 (2013).
- 501 13. Kröger, C. *et al.* The transcriptional landscape and small RNAs of Salmonella  
502 enterica serovar Typhimurium. *Proc. Natl. Acad. Sci.* **109**, E1277-86 (2012).
- 503 14. Colgan, A. M. *et al.* The Impact of 18 Ancestral and Horizontally-Acquired  
504 Regulatory Proteins upon the Transcriptome and sRNA Landscape of Salmonella  
505 enterica serovar Typhimurium. *PLOS Genet.* **12**, e1006258 (2016).
- 506 15. Sharma, C. M. *et al.* The primary transcriptome of the major human pathogen  
507 *Helicobacter pylori*. *Nature* **464**, 250–255 (2010).

- 508 16. Fàbrega, A. & Vila, J. Salmonella enterica serovar Typhimurium skills to succeed  
509 in the host: virulence and regulation. *Clin. Microbiol. Rev.* **26**, 308–341 (2013).
- 510 17. Haiko, J., Suomalainen, M., Ojala, T., Lähteenmäki, K. & Korhonen, T. K. Invited  
511 review: Breaking barriers--attack on innate immune defences by omptin surface  
512 proteases of enterobacterial pathogens. *Innate Immun.* **15**, 67–80 (2009).
- 513 18. Guina, T., Yi, E. C., Wang, H., Hackett, M. & Miller, S. I. A PhoP-regulated outer  
514 membrane protease of Salmonella enterica serovar typhimurium promotes  
515 resistance to alpha-helical antimicrobial peptides. *J. Bacteriol.* **182**, 4077–4086  
516 (2000).
- 517 19. Riva, R., Korhonen, T. K. & Meri, S. The outer membrane protease PgtE of  
518 Salmonella enterica interferes with the alternative complement pathway by  
519 cleaving factors B and H. *Front. Microbiol.* **6**, (2015).
- 520 20. Ramu, P. *et al.* Activation of pro-matrix metalloproteinase-9 and degradation of  
521 gelatin by the surface protease PgtE of Salmonella enterica serovar  
522 Typhimurium. *Int. J. Med. Microbiol. IJMM* **298**, 263–278 (2008).
- 523 21. Lähteenmäki, K., Kyllönen, P., Partanen, L. & Korhonen, T. K. Antiprotease  
524 inactivation by Salmonella enterica released from infected macrophages. *Cell.*  
525 *Microbiol.* **7**, 529–538 (2005).
- 526 22. Pietilä, T. E. *et al.* Activation, cytokine production, and intracellular survival of  
527 bacteria in Salmonella-infected human monocyte-derived macrophages and  
528 dendritic cells. *J. Leukoc. Biol.* **78**, 909–920 (2005).
- 529 23. Valls Serón, M., Haiko, J., De Groot, P. G., Korhonen, T. K. & Meijers, J. C. M.  
530 Thrombin-activatable fibrinolysis inhibitor is degraded by Salmonella enterica and  
531 Yersinia pestis. *J. Thromb. Haemost.* **8**, 2232–2240 (2010).

- 532 24. Yun, T. H., Cott, J. E., Tapping, R. I., Slauch, J. M. & Morrissey, J. H. Proteolytic  
533 inactivation of tissue factor pathway inhibitor by bacterial omptins. *Blood* **113**,  
534 1139–1148 (2009).
- 535 25. Eriksson, S., Lucchini, S., Thompson, A., Rhen, M. & Hinton, J. C. Unravelling  
536 the biology of macrophage infection by gene expression profiling of intracellular  
537 *Salmonella enterica*. *Mol. Microbiol.* **47**, 103–118 (2003).
- 538 26. Srikumar, S. *et al.* RNA-seq Brings New Insights to the Intra-Macrophage  
539 Transcriptome of *Salmonella Typhimurium*. *PLoS Pathog.* **11**, e1005262 (2015).
- 540 27. Navarre, W. W. *et al.* Co-regulation of *Salmonella enterica* genes required for  
541 virulence and resistance to antimicrobial peptides by SlyA and PhoP/PhoQ. *Mol.*  
542 *Microbiol.* **56**, 492–508 (2005).
- 543 28. Grossman, N. *et al.* Lipopolysaccharide size and distribution determine serum  
544 resistance in *Salmonella montevideo*. *J. Bacteriol.* **169**, 856–863 (1987).
- 545 29. Murray, G. L., Attridge, S. R. & Morona, R. Regulation of *Salmonella typhimurium*  
546 lipopolysaccharide O antigen chain length is required for virulence; identification  
547 of FepE as a second Wzz. *Mol. Microbiol.* **47**, 1395–1406 (2003).
- 548 30. Rautemaa, R. & Meri, S. Complement-resistance mechanisms of bacteria.  
549 *Microbes Infect.* **1**, 785–794 (1999).
- 550 31. Kukkonen, M. & Korhonen, T. K. The omptin family of enterobacterial surface  
551 proteases/adhesins: from housekeeping in *Escherichia coli* to systemic spread of  
552 *Yersinia pestis*. *Int. J. Med. Microbiol.* **294**, 7–14 (2004).
- 553 32. Parsons, B. N. *et al.* Invasive Non-Typhoidal *Salmonella Typhimurium* ST313 Are  
554 Not Host-Restricted and Have an Invasive Phenotype in Experimentally Infected  
555 Chickens. *PLoS Negl. Trop. Dis.* **7**, e2487 (2013).

- 556 33. Thomson, N. R. *et al.* Comparative genome analysis of Salmonella Enteritidis  
557 PT4 and Salmonella Gallinarum 287/91 provides insights into evolutionary and  
558 host adaptation pathways. *Genome Res.* **18**, 1624–37 (2008).
- 559 34. Viana, D. *et al.* A single natural nucleotide mutation alters bacterial pathogen  
560 host tropism. *Nat. Genet.* (2015). doi:10.1038/ng.3219
- 561 35. Sheppard, S. K. *et al.* Genome-wide association study identifies vitamin B5  
562 biosynthesis as a host specificity factor in Campylobacter. *Proc. Natl. Acad. Sci.*  
563 **110**, 11923–11927 (2013).
- 564 36. Lisser, S. & Margalit, H. Compilation of E. coli mRNA promoter sequences.  
565 *Nucleic Acids Res.* **21**, 1507–1516 (1993).
- 566 37. Zaunbrecher, M. A., Sikes, R. D., Metchock, B., Shinnick, T. M. & Posey, J. E.  
567 Overexpression of the chromosomally encoded aminoglycoside acetyltransferase  
568 eis confers kanamycin resistance in Mycobacterium tuberculosis. *Proc. Natl.*  
569 *Acad. Sci.* **106**, 20004–20009 (2009).
- 570 38. Blount, Z. D., Barrick, J. E., Davidson, C. J. & Lenski, R. E. Genomic analysis of  
571 a key innovation in an experimental Escherichia coli population. *Nature* **489**,  
572 513–518 (2012).
- 573 39. Carden, S. E. *et al.* Pseudogenization of the Secreted Effector Gene ssel  
574 Confers Rapid Systemic Dissemination of S. Typhimurium ST313 within  
575 Migratory Dendritic Cells. *Cell Host Microbe* **21**, 182–194 (2017).
- 576 40. Gondwe, E. N. *et al.* Importance of antibody and complement for oxidative burst  
577 and killing of invasive nontyphoidal Salmonella by blood cells in Africans. *Proc.*  
578 *Natl. Acad. Sci.* **107**, 3070–3075 (2010).

- 579 41. Nicol, J. W., Helt, G. A., Blanchard, S. G., Raja, A. & Loraine, A. E. The  
580 Integrated Genome Browser: free software for distribution and exploration of  
581 genome-scale datasets. *Bioinforma. Oxf. Engl.* **25**, 2730–2731 (2009).
- 582 42. Livak, K. J. & Schmittgen, T. D. Analysis of relative gene expression data using  
583 real-time quantitative PCR and the 2(-Delta Delta C(T)) Method. *Methods San*  
584 *Diego Calif* **25**, 402–408 (2001).
- 585 43. Hoffmann, S. *et al.* Fast Mapping of Short Sequences with Mismatches,  
586 Insertions and Deletions Using Index Structures. *PLOS Comput. Biol.* **5**,  
587 e1000502 (2009).
- 588 44. Richardson, E. J. *et al.* Genome sequences of *Salmonella enterica* serovar  
589 typhimurium, Choleraesuis, Dublin, and Gallinarum strains of well- defined  
590 virulence in food-producing animals. *J. Bacteriol.* **193**, 3162–3163 (2011).
- 591 45. Wagner, G. P., Kin, K. & Lynch, V. J. Measurement of mRNA abundance using  
592 RNA-seq data: RPKM measure is inconsistent among samples. *Theory Biosci.*  
593 *Theor. Den Biowissenschaften* **131**, 281–5 (2012).
- 594 46. Wagner, G. P., Kin, K. & Lynch, V. J. A model based criterion for gene  
595 expression calls using RNA-seq data. *Theory Biosci. Theor. Den*  
596 *Biowissenschaften* **132**, 159–64 (2013).
- 597 47. Delcher, A. L., Phillippy, A., Carlton, J. & Salzberg, S. L. Fast algorithms for  
598 large-scale genome alignment and comparison. *Nucleic Acids Res.* **30**, 2478–  
599 2483 (2002).
- 600 48. Datsenko, K. A. & Wanner, B. L. One-step inactivation of chromosomal genes in  
601 *Escherichia coli* K-12 using PCR products. *Proc. Natl. Acad. Sci.* **97**, 6640–5  
602 (2000).



- 603 49. Datta, S., Costantino, N. & Court, D. L. A set of recombineering plasmids for  
604 gram-negative bacteria. *Gene* **379**, 109–15 (2006).
- 605 50. Koskiniemi, S., Pranting, M., Gullberg, E., Nasvall, J. & Andersson, D. I.  
606 Activation of cryptic aminoglycoside resistance in *Salmonella enterica*. *Mol.*  
607 *Microbiol.* **80**, 1464–1478 (2011).
- 608 51. Schmieger, H. Phage P22-mutants with increased or decreased transduction  
609 abilities. *Mol. Gen. Genet. MGG* **119**, 75–88 (1972).
- 610 52. Kintz, E. *et al.* A BTP1 prophage gene present in invasive non-typhoidal  
611 *Salmonella* determines composition and length of the O-antigen of the  
612 lipopolysaccharide. *Mol. Microbiol.* n/a-n/a (2015). doi:10.1111/mmi.12933
- 613 53. Sawitzke, J. A. *et al.* Probing cellular processes with oligo-mediated  
614 recombination and using the knowledge gained to optimize recombineering. *J.*  
615 *Mol. Biol.* **407**, 45–59 (2011).
- 616 54. Martínez-García, E. & de Lorenzo, V. Engineering multiple genomic deletions in  
617 Gram-negative bacteria: analysis of the multi-resistant antibiotic profile of  
618 *Pseudomonas putida* KT2440. *Environ. Microbiol.* **13**, 2702–2716 (2011).
- 619 55. Wells, T. J. *et al.* Increased severity of respiratory infections associated with  
620 elevated anti-LPS IgG2 which inhibits serum bactericidal killing. *J. Exp. Med.*  
621 **211**, 1893–1904 (2014).
- 622 56. Salisbury, A.-M., Bronowski, C. & Wigley, P. *Salmonella* Virchow isolates from  
623 human and avian origins in England--molecular characterization and infection of  
624 epithelial cells and poultry. *J. Appl. Microbiol.* **111**, 1505–1514 (2011).
- 625 57. Coil, D., Jospin, G. & Darling, A. E. A5-miseq: an updated pipeline to assemble  
626 microbial genomes from Illumina MiSeq data. *Bioinforma. Oxf. Engl.* **31**, 587–589  
627 (2015).

- 628 58. Assefa, S., Keane, T. M., Otto, T. D., Newbold, C. & Berriman, M. ABACAS:  
629 algorithm-based automatic contiguation of assembled sequences. *Bioinforma.*  
630 *Oxf. Engl.* **25**, 1968–1969 (2009).
- 631 59. Laing, C. *et al.* Pan-genome sequence analysis using Panseq: an online tool for  
632 the rapid analysis of core and accessory genomic regions. *BMC Bioinformatics*  
633 **11**, 461 (2010).
- 634 60. Guindon, S., Delsuc, F., Dufayard, J.-F. & Gascuel, O. Estimating maximum  
635 likelihood phylogenies with PhyML. *Methods Mol. Biol. Clifton NJ* **537**, 113–137  
636 (2009).

### 637 **Acknowledgements**

638 We are grateful to present and former members of the Hinton lab for helpful  
639 discussions, particularly Sathesh Srivasankaran and Aoife Colgan. We thank Paul  
640 Loughnane for his expert technical assistance, and Rob Kingsley for provision of  
641 strains. This work was supported by funding from a Wellcome Trust Senior Investigator  
642 award to JH (Grant 106914/Z/15/Z). DH was supported by the Wenner-Gren Foundation,  
643 Sweden. NW was supported by an Early Postdoc Mobility 543 fellowship from the Swiss  
644 National Science Foundation. RC was supported by an EU Marie Curie 544 International  
645 Incoming Fellowship (FP7-PEOPLE-2013-IIF, Project Reference 628450).

### 646 **Author Contributions**

647 Conceived and designed experiments: DLH, CK, SVO and JCDH. Completed experiments  
648 and collected data: DLH, CK, SVO, LL, NW, TJW, PW and KH. Analysed and interpreted  
649 data: DLH, CK, SVO, RC, IRH, PW and JCDH. Wrote, critically revised or approved the  
650 final manuscript: DLH, CK, SVO, RC, LL, NW, TJW, IRH, PW, KH, NAF, MAG, JCDH.

651 **Figure legends**

652 **Figure 1. Primary transcriptome analysis of D23580 shows virulence gene *pgtE***  
653 **is highly expressed, and is associated with a SNP in the conserved -10 promoter**  
654 **motif.** Classification of Transcriptional Start Sites of *S. Typhimurium* in 4/74 and  
655 D23580. (A) Categorization of TSS identified in *S. Typhimurium* 4/74 and D23580,  
656 respectively, into nine different promoter classes<sup>15</sup>. (B) Visualization of Mapped  
657 Sequence Reads of the SPI1 Pathogenicity Island in *S. Typhimurium* 4/74 and  
658 D23580, respectively (IGB, scale 0–100 normalized reads for every sample). Names  
659 of coding genes and sRNAs are labelled in black and blue, respectively. TSS are  
660 indicated by arrows. (C) The sequence reads mapped to the *pgtE* locus were  
661 visualized in the Integrated Genome Browser<sup>41</sup> (scale 0–100 normalized reads for  
662 every sample). Magnified region shows the *pgtE* promoter with -35/-10 promoter motifs  
663 in bold, and the T<sup>D23580</sup> or C<sup>4/74</sup> SNP highlighted.

664

665 **Figure 2. The T<sup>D23580</sup> SNP in the *pgtE* promoter of *S. Typhimurium* is associated**  
666 **with increased *pgtE* transcription, PgtE protein production** (A) The level of *pgtE*  
667 transcript was measured by qRT-PCR and the relative gene expression, normalized  
668 to endogenous control *hns* was calculated using the *ddCt* algorithm<sup>42</sup> and is the  
669 average of 3 biological experiments, with standard errors. Significant differences were  
670 analysed using an unpaired t-test (\**p* < 0.01). (B) Immunodetection by Western blotting  
671 of FLAG-tagged PgtE in representative strains of ST313 and ST19. The status of *pgtE*  
672 promoter (*P<sup>pgtE</sup>*) is only indicated for the strains with a mutated promoter. Detection of  
673 DnaK served as loading control.

674

675 **Figure 3. The *pgtE* promoter T<sup>D23580</sup> SNP mediates increased resistance to**  
676 **human serum killing, enhances cleavage of human Complement Factor B and**  
677 **promotes virulence in the chicken infection model.** (A) Sensitivity to pooled  
678 healthy human serum was assayed in a  $\Delta waaG$  background (truncated LPS) to  
679 observe only the effect of outer membrane proteases. D23580  $\Delta waaG$  showed  
680 significantly less serum-sensitivity than D23580 *pgtE*<sup>P4/74</sup>  $\Delta waaG$  and D23580  $\Delta pgtE$   
681  $\Delta waaG$  (*P*=0.04). (B) PgtE-dependent cleavage of Complement Factor B detected by  
682 Western blotting. Polyclonal antibody against factor B was used. (C) Viable counts of  
683 *Salmonella Typhimurium* D23580-derived strains as log CFU/g of spleen at 3 days

684 post-oral infection ( $10^8$  CFU) of 7 day-old Lohmann Brown Layers. Data based on 19  
685 individually sampled birds for each group; combined data for two separately repeated  
686 experiments. Each symbol represents the value for an individual chicken and the bars  
687 represent the median value for each group. Significance of differences between the  
688 groups was examined using a Mann–Whitney test. \*,  $P < 0.05$ ; \*\*,  $P < 0.01$ .

689

690 **Figure 4. Conservation of the *pgtE* promoter -10 T<sup>D23580</sup> nucleotide across *S.***  
691 ***enterica* ssp. *enterica*.** Maximum likelihood phylogenetic tree of 266 *S. enterica*  
692 genomes. Presence of C or T nucleotide at the -10 position of the *pgtE* promoter is  
693 indicated by blue and red respectively. The T nucleotide is found in 100 % of ST313  
694 lineage 2 genomes surveyed. Outside of serovar Typhimurium, the T nucleotide is also  
695 present in the genome of Gallinarum isolate 287/91.

696 **Supplementary data**

697 **Supplementary Figure 1. Radial phylogeny illustrating the population structure**  
698 **of *S. Typhimurium* ST313 in the context of the *pgtE* promoter SNP.** The  
699 phylogenetic tree is reproduced with permission<sup>7</sup>. Red and blue coloured areas  
700 represent the presence of the T<sup>D23580</sup> or C<sup>4/74</sup> genotype respectively. Green coloured  
701 shading indicates the isolates belonging to the 313 sequence type.

702 **Supplementary Figure 1:** The *pgtE* promoter SNP in the context of *S. Typhimurium*  
703 ST313 population structure.

704 **Supplementary Table 1:** All TSS identified in D23580, and comparison to strain 4/74

705 **Supplementary Table 2:** SNPs and indels in the D23580 genome compared to the  
706 4/74 genome

707 **Supplementary Table 3:** All SNPs within the -40 bp region of identified primary TSS  
708 in D23580 and PUV values for the respective TSS in D23580 and 4/74

709 **Supplementary Table 4:** Accession numbers, phylogenetic designation and *pgtE*  
710 TSS -40 sequence of all genomes sequences used in this study.

711 **Supplementary Table 5:** All bacterial strains and plasmids used in this study

712 **Supplementary Table 6:** All oligonucleotides used in this study

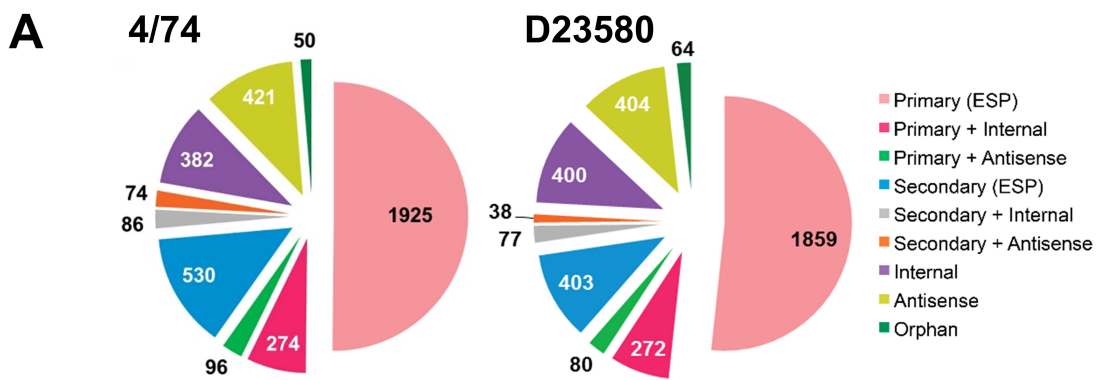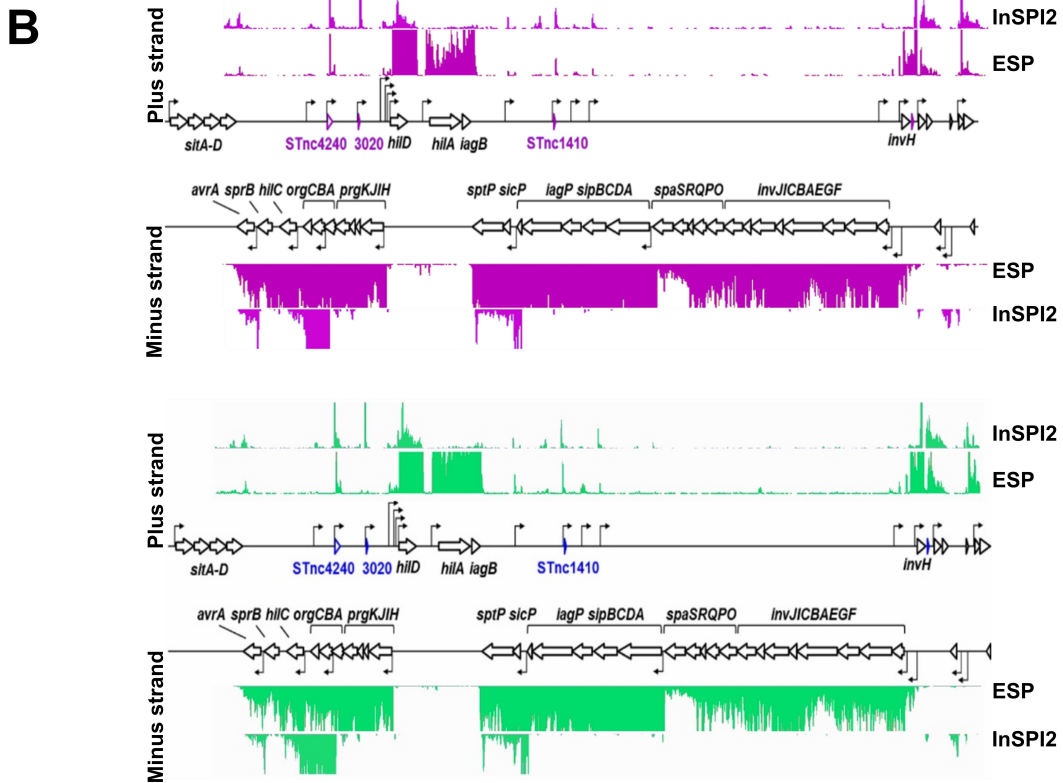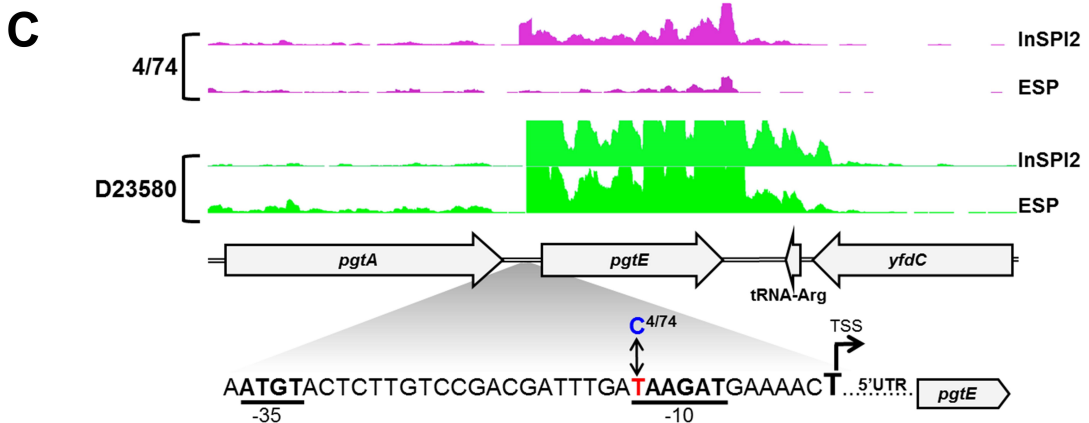

**A**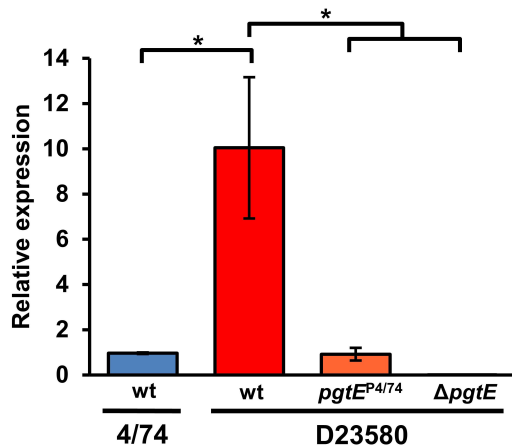**B**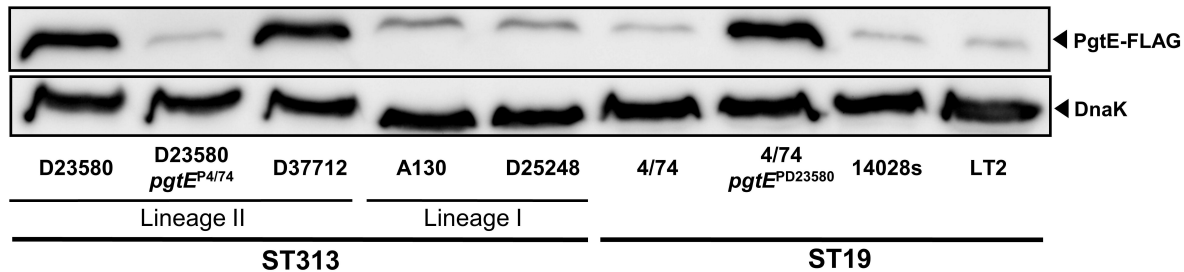

**A**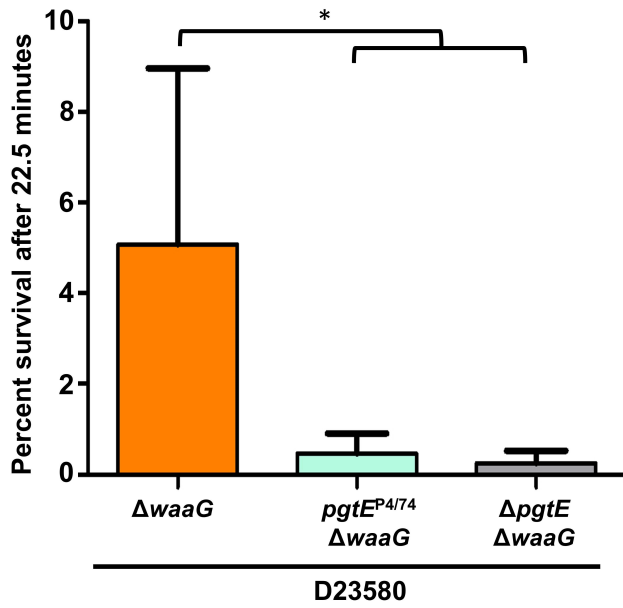**B**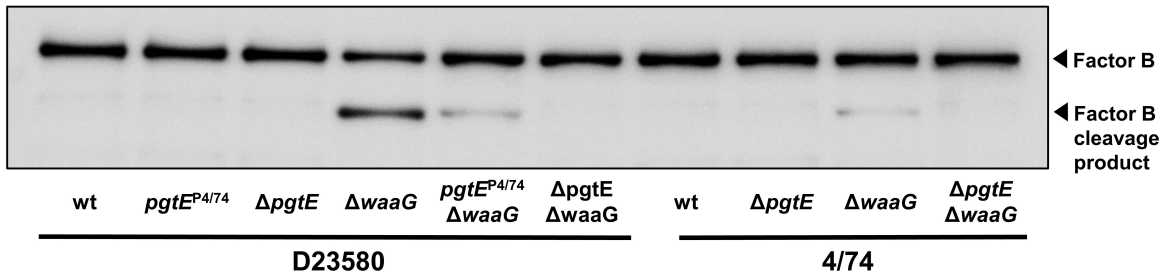**C**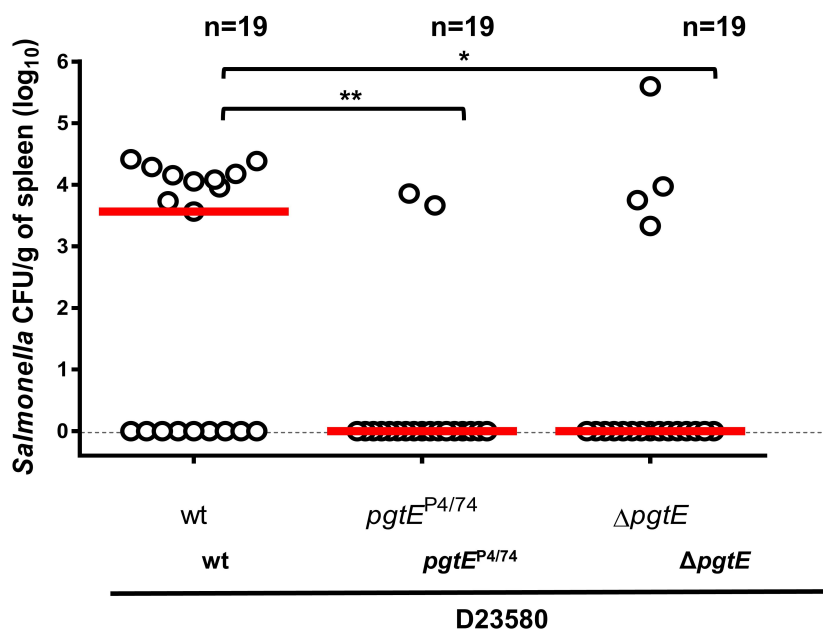

■ 'T' *pgtE*<sup>Promoter</sup> SNP  
■ 'C' *pgtE*<sup>Promoter</sup> SNP

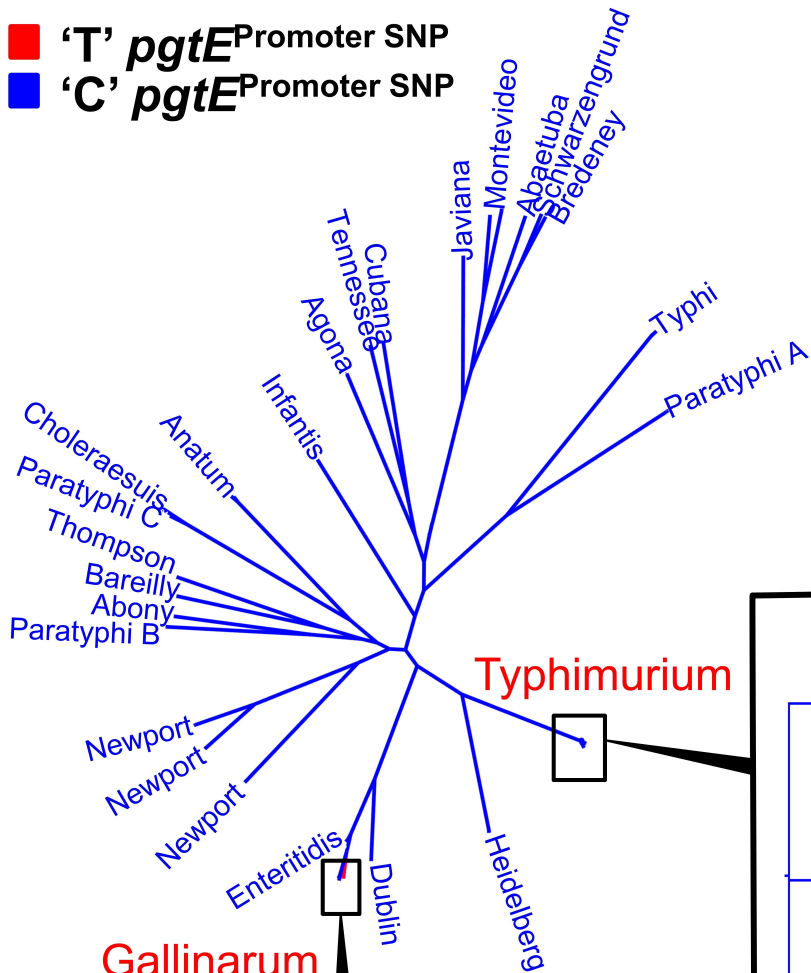

Gallinarum

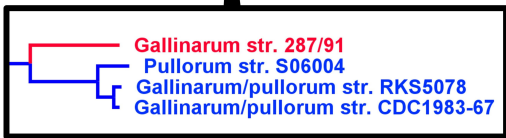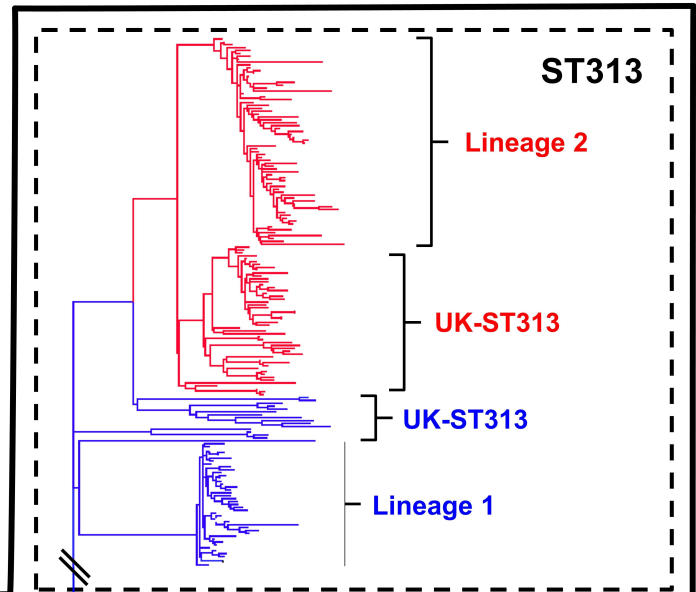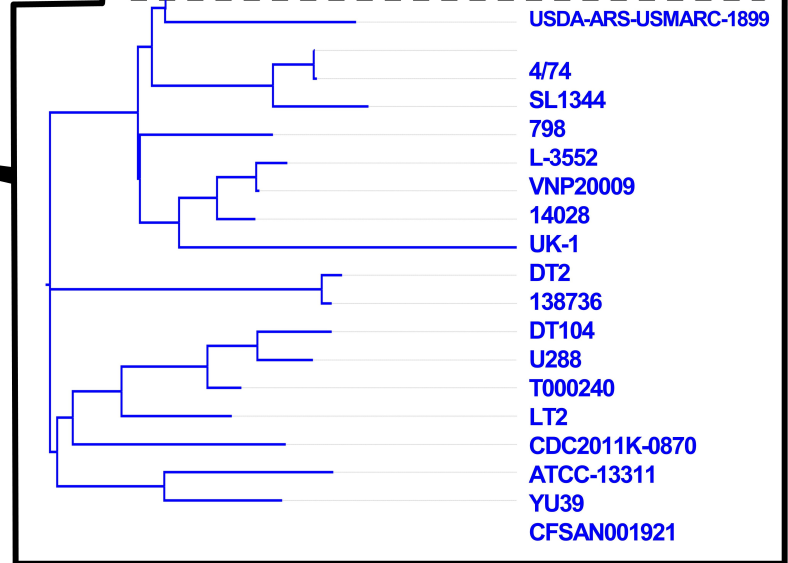

Source: http://www.biorxiv.org/content/10.1101/175265v1.full.pdf
